# Supplementary material for: The clinical indications for testing women for Mycoplasma genitalium
Source: HighWire-hosted journal article supplement (doi:10.1136/sextrans-2020-054818), 2021-07-01
Supplement: sextrans-2020-054818supp001_data_supplement.pdf [file sextrans-2020-054818supp001_data_supplement.pdf]

## SUPPLEMENTARY MATERIAL

| Supplementary Table 1. Genital coinfections with <i>Mycoplasma genitalium</i> <sup>ab</sup> |                                    |              |                                 |              |                                              |                      |
|---------------------------------------------------------------------------------------------|------------------------------------|--------------|---------------------------------|--------------|----------------------------------------------|----------------------|
|                                                                                             | MG negative n= 1220<br>(%, 95% CI) |              | MG positive n=83<br>(%, 95% CI) |              | Adjusted Odds Ratio<br>(95% CI) <sup>c</sup> | p-value <sup>d</sup> |
| <b><i>Chlamydia trachomatis</i><sup>e</sup></b>                                             |                                    |              |                                 |              |                                              |                      |
| Negative                                                                                    | 1118                               | (92, 91–94)  | 75                              | (90, 82–96)  | 1                                            |                      |
| Positive                                                                                    | 92                                 | (8, 6–9)     | 8                               | (10, 4–18)   | 1.28                                         | (0.60–2.74) 0.525    |
| <b><i>Neisseria gonorrhoeae</i><sup>f</sup></b>                                             |                                    |              |                                 |              |                                              |                      |
| Negative                                                                                    | 1199                               | (99, 98–100) | 82                              | (99, 93–100) | 1                                            |                      |
| Positive                                                                                    | 11                                 | (1, 0–2)     | 1                               | (1, 0–7)     | 1.27                                         | (0.16–10.01) 0.818   |
| <b>Bacterial vaginosis<sup>g</sup></b>                                                      |                                    |              |                                 |              |                                              |                      |
| Negative                                                                                    | 813                                | (70, 67–73)  | 51                              | (64, 52–74)  | 1                                            |                      |
| Positive                                                                                    | 349                                | (30, 27–33)  | 29                              | (36, 26–48)  | 1.29                                         | (0.80–2.07) 0.295    |
| <b>Vulvovaginal candidiasis<sup>h</sup></b>                                                 |                                    |              |                                 |              |                                              |                      |
| Negative                                                                                    | 918                                | (77, 74–79)  | 61                              | (74, 64–83)  | 1                                            |                      |
| Positive                                                                                    | 281                                | (23, 21–26)  | 21                              | (26, 17–36)  | 1.12                                         | (0.67–1.88) 0.658    |

Abbreviations: MG=*Mycoplasma genitalium*, n=number, CI=confidence interval

<sup>a</sup>Women with an unassessable MG result (n=15) were excluded from the analysis

<sup>b</sup>*Trichomonas vaginalis* is extremely uncommon at Melbourne Sexual Health Centre and present in <1% of attendees. 41 women with MG were assessed for *T. vaginalis* and only 1 (2%) was positive for *T. vaginalis*.

<sup>c</sup>Adjusted for number of male sexual partners in the last three months as a risk factor.

<sup>d</sup>p-value calculated using logistic regression

<sup>e</sup>*C. trachomatis* result was unassessable in 9 women and not tested for in 1 woman.

<sup>f</sup>*N. gonorrhoeae* result was unassessable in 8 women and not tested for in 2 women.

<sup>g</sup>Bacterial vaginosis was not assessed in 61 women.

<sup>h</sup>Vulvovaginal candidiasis was not assessed in 22 women.

**Supplementary Table 2. Associations between *Chlamydia trachomatis* and demographics, past sexual practices and self-reported symptoms in the prior week<sup>a</sup>**

|                                                                         | CT negative<br>N=1133<br>median (range) or<br>n (%), 95% CI) | CT positive N=92<br>[median (range) or<br>n (%), 95% CI] | Adjusted Odds Ratio<br>(95% CI) <sup>b</sup> | p-<br>value <sup>c</sup> |
|-------------------------------------------------------------------------|--------------------------------------------------------------|----------------------------------------------------------|----------------------------------------------|--------------------------|
| <b>Median age</b>                                                       | 26 (23-29)                                                   | 24 (22-29)                                               | 0.97 (0.92–1.01)                             | 0.123                    |
| <b>Median number of male partners in past 12m</b>                       | 4 (2-6)                                                      | 4 (3-6)                                                  | 1.02 (0.98–1.06)                             | 0.341                    |
| <b>Condom use in past 12m<sup>d</sup></b>                               |                                                              |                                                          |                                              |                          |
| Always                                                                  | 82 (7, 6-9)                                                  | 3 (3, 1-9)                                               | 1                                            |                          |
| Not Always                                                              | 1032 (93, 91-94)                                             | 88 (97, 91-99)                                           | 2.90 (0.69–12.09)                            | 0.144                    |
| <b>STI in the past 6m<sup>de</sup></b>                                  |                                                              |                                                          |                                              |                          |
| No                                                                      | 966 (87, 85-89)                                              | 77 (87, 78-93)                                           | 1                                            |                          |
| Yes                                                                     | 146 (13, 11-15)                                              | 12 (13, 7-22)                                            | 0.65 (0.29-1.45)                             | 0.295                    |
| <b><u>Self-reported symptoms (in the week prior to recruitment)</u></b> |                                                              |                                                          |                                              |                          |
| <b>Abdominal Pain</b>                                                   |                                                              |                                                          |                                              |                          |
| No                                                                      | 967 (86, 84-88)                                              | 79 (86, 77-92)                                           | 1                                            |                          |
| Yes                                                                     | 161 (14, 12-16)                                              | 13 (14, 8-23)                                            | 0.86 (0.44-1.66)                             | 0.647                    |
| Missing                                                                 | 5                                                            | 0                                                        |                                              |                          |
| <b>Dyspareunia</b>                                                      |                                                              |                                                          |                                              |                          |
| <b>Women with VVC</b>                                                   |                                                              |                                                          |                                              |                          |
| No                                                                      | 256 (93, 89-96)                                              | 8 (73, 39-94)                                            | 1                                            |                          |
| Yes                                                                     | 20 (7, 4-11)                                                 | 3 (27, 6-61)                                             | 8.66 (1.90-39.54)                            | <b>0.005</b>             |
| <b>Women without VVC</b>                                                |                                                              |                                                          |                                              |                          |
| No                                                                      | 741 (90, 87-91)                                              | 71 (93, 85-98)                                           | 1                                            |                          |
| Yes                                                                     | 87 (10, 9-13)                                                | 5 (7, 2-15)                                              | 0.48 (0.17-1.35)                             | 0.164                    |
| <b>Vaginal discharge</b>                                                |                                                              |                                                          |                                              |                          |
| No                                                                      | 755 (67, 64-70)                                              | 48 (53, 43-64)                                           | 1                                            |                          |
| Yes                                                                     | 369 (33, 30-36)                                              | 42 (47, 36-57)                                           | 2.12 (1.32-3.42)                             | <b>0.002</b>             |
| Missing                                                                 | 9                                                            | 2                                                        |                                              |                          |
| <b>Abnormal vaginal odour<sup>f</sup></b>                               |                                                              |                                                          |                                              |                          |
| No                                                                      | 859 (76, 74-79)                                              | 65 (71, 61-80)                                           | 1                                            |                          |
| Yes                                                                     | 264 (24, 21-26)                                              | 26 (29, 20-39)                                           | 1.36 (0.80-2.32)                             | 0.257                    |
| Missing                                                                 | 10                                                           | 1                                                        |                                              |                          |
| <b>Vaginal itch</b>                                                     |                                                              |                                                          |                                              |                          |
| No                                                                      | 886 (79, 76-81)                                              | 77 (85, 76-91)                                           | 1                                            |                          |
| Yes                                                                     | 241 (21, 19-24)                                              | 14 (15, 9-24)                                            | 0.74 (0.37-1.48)                             | 0.399                    |
| Missing                                                                 | 6                                                            | 1                                                        |                                              |                          |
| <b>Post-coital bleeding</b>                                             |                                                              |                                                          |                                              |                          |
| No                                                                      | 1033 (92, 90-94)                                             | 81 (89, 81-95)                                           | 1                                            |                          |
| Yes                                                                     | 89 (8, 6-10)                                                 | 10 (11, 5-19)                                            | 1.22 (0.56-2.62)                             | 0.620                    |
| Missing                                                                 | 11                                                           | 1                                                        |                                              |                          |
| <b>Intermenstrual bleeding</b>                                          |                                                              |                                                          |                                              |                          |
| No                                                                      | 1013 (90, 88-92)                                             | 82 (92, 84-97)                                           | 1                                            |                          |
| Yes                                                                     | 111 (10, 8-12)                                               | 7 (8, 3-16)                                              | 0.78 (0.35-1.77)                             | 0.557                    |
| Missing                                                                 | 9                                                            | 3                                                        |                                              |                          |

**Dysuria**

|         |     |             |    |             |      |                   |
|---------|-----|-------------|----|-------------|------|-------------------|
| No      | 978 | (87, 85-89) | 83 | (92, 85-97) | 1    |                   |
| Yes     | 148 | (13, 11-15) | 7  | (8, 3-15)   | 0.55 | (0.23-1.30) 0.173 |
| Missing | 7   |             | 2  |             |      |                   |

**Urinary frequency**

|         |     |             |    |             |      |                   |
|---------|-----|-------------|----|-------------|------|-------------------|
| No      | 935 | (83, 81-85) | 71 | (79, 69-87) | 1    |                   |
| Yes     | 191 | (17, 15-19) | 19 | (21, 13-31) | 1.22 | (0.68-2.18) 0.508 |
| Missing | 7   |             | 2  |             |      |                   |

Abbreviations: CT=*Chlamydia trachomatis*, n=number, CI=confidence interval, STI=sexually transmitted infection; m=month, VVC = vulvovaginal candidiasis

<sup>a</sup>Women with an unassessable CT result (n=10) or with *M. genitalium* (n= 83; includes 8 women co-infected with MG and *C. trachomatis*) were excluded from the analysis

<sup>b</sup>All analyses were adjusted for number of male partners, VVC, *N. gonorrhoea* and concurrent BV.

<sup>c</sup>p-value calculated using logistic regression and bold indicates significant findings p<0.05.

<sup>d</sup>Data missing for up to 3% of participants.

<sup>e</sup>STI in the past six months referred to bacterial STI only, however some women may have misinterpreted this question and answered with regards to warts or other nonbacterial STI, and therefore this should be interpreted with caution.

<sup>§</sup> We tested for interaction terms between CT and genital co-infections and the only significant interaction was between CT and VVC for dyspareunia (p=0.016). Therefore, the association between dyspareunia and CT could not be adjusted for VVC. To account for potential confounding by VVC on the relationship between CT and dyspareunia, data were then stratified by VVC status, and the association between CT and dyspareunia was investigated within each stratum.

<sup>f</sup>Abnormal vaginal odour refers to any self-reported odour, not specifically a fishy odour

| <b>Supplementary Table 3. Self-reported symptoms and clinical signs identified in women with <i>Mycoplasma genitalium</i> compared to women with <i>Chlamydia trachomatis</i><sup>ab</sup></b> |                          |             |                          |             |                            |
|------------------------------------------------------------------------------------------------------------------------------------------------------------------------------------------------|--------------------------|-------------|--------------------------|-------------|----------------------------|
| <b>Self-reported symptoms</b>                                                                                                                                                                  |                          |             |                          |             |                            |
|                                                                                                                                                                                                | <b>MG positive, n=75</b> |             | <b>CT positive, n=92</b> |             | <b>p-value<sup>c</sup></b> |
|                                                                                                                                                                                                | <b>(%, 95% CI)</b>       |             | <b>(%, 95% CI)</b>       |             |                            |
| <b>Cohort</b>                                                                                                                                                                                  |                          |             |                          |             |                            |
| Asymptomatic                                                                                                                                                                                   | 8                        | (11, 5-20)  | 13                       | (14, 8-23)  | 0.502                      |
| Symptomatic                                                                                                                                                                                    | 67                       | (89, 80-95) | 79                       | (86, 77-92) |                            |
| <b>Abdominal Pain</b>                                                                                                                                                                          |                          |             |                          |             |                            |
| No                                                                                                                                                                                             | 64                       | (86, 77-93) | 79                       | (86, 77-92) | 0.909                      |
| Yes                                                                                                                                                                                            | 10                       | (14, 7-23)  | 13                       | (14, 8-23)  |                            |
| Missing                                                                                                                                                                                        | 1                        |             | 0                        |             |                            |
| <b>Dyspareunia</b>                                                                                                                                                                             |                          |             |                          |             |                            |
| No                                                                                                                                                                                             | 66                       | (90, 81-96) | 81                       | (90, 82-95) | 0.930                      |
| Yes                                                                                                                                                                                            | 7                        | (10, 4-19)  | 9                        | (10, 5-18)  |                            |
| Missing                                                                                                                                                                                        | 2                        |             | 2                        |             |                            |
| <b>Vaginal discharge</b>                                                                                                                                                                       |                          |             |                          |             |                            |
| No                                                                                                                                                                                             | 48                       | (65, 53-76) | 48                       | (53, 43-64) | 0.136                      |
| Yes                                                                                                                                                                                            | 26                       | (35, 24-47) | 42                       | (47, 36-57) |                            |
| Missing                                                                                                                                                                                        | 1                        |             | 2                        |             |                            |
| <b>Abnormal odour<sup>c</sup></b>                                                                                                                                                              |                          |             |                          |             |                            |
| No                                                                                                                                                                                             | 60                       | (81, 70-89) | 65                       | (71, 61-80) | 0.150                      |
| Yes                                                                                                                                                                                            | 14                       | (19, 11-30) | 26                       | (29, 20-39) |                            |
| Missing                                                                                                                                                                                        | 1                        |             | 1                        |             |                            |
| <b>Vaginal itch</b>                                                                                                                                                                            |                          |             |                          |             |                            |
| No                                                                                                                                                                                             | 55                       | (74, 63-84) | 77                       | (85, 76-91) | 0.100                      |
| Yes                                                                                                                                                                                            | 19                       | (26, 16-37) | 14                       | (15, 9-24)  |                            |
| Missing                                                                                                                                                                                        | 1                        |             | 1                        |             |                            |
| <b>Post-coital bleeding</b>                                                                                                                                                                    |                          |             |                          |             |                            |
| No                                                                                                                                                                                             | 64                       | (89, 79-95) | 81                       | (89, 81-95) | 0.980                      |
| Yes                                                                                                                                                                                            | 8                        | (11, 5-21)  | 10                       | (11, 5-19)  |                            |
| Missing                                                                                                                                                                                        | 3                        |             | 1                        |             |                            |
| <b>Intermenstrual bleeding</b>                                                                                                                                                                 |                          |             |                          |             |                            |
| No                                                                                                                                                                                             | 65                       | (88, 78-94) | 82                       | (92, 84-97) | 0.359                      |
| Yes                                                                                                                                                                                            | 9                        | (12, 6-22)  | 7                        | (8, 3-15)   |                            |
| Missing                                                                                                                                                                                        | 1                        |             | 3                        |             |                            |
| <b>Dysuria</b>                                                                                                                                                                                 |                          |             |                          |             |                            |
| No                                                                                                                                                                                             | 64                       | (85, 75-92) | 83                       | (92, 85-97) | 0.158                      |
| Yes                                                                                                                                                                                            | 11                       | (15, 8-25)  | 7                        | (8, 3-15)   |                            |
| Missing                                                                                                                                                                                        | 0                        |             | 1                        |             |                            |
| <b>Urinary frequency</b>                                                                                                                                                                       |                          |             |                          |             |                            |
| No                                                                                                                                                                                             | 62                       | (83, 72-90) | 71                       | (79, 69-88) | 0.541                      |
| Yes                                                                                                                                                                                            | 13                       | (17, 10-28) | 19                       | (21, 13-31) |                            |
| Missing                                                                                                                                                                                        | 0                        |             | 2                        |             |                            |
| <b>Fever</b>                                                                                                                                                                                   |                          |             |                          |             |                            |
| No                                                                                                                                                                                             | 71                       | (96, 89-99) | 87                       | (97, 91-99) | 0.807                      |
| Yes                                                                                                                                                                                            | 3                        | (4, 1-11)   | 3                        | (3, 1-9)    |                            |
| Missing                                                                                                                                                                                        | 1                        |             | 2                        |             |                            |

| <b>Clinical signs on examination<sup>b</sup></b> |                          |                    |                          |                    |                            |
|--------------------------------------------------|--------------------------|--------------------|--------------------------|--------------------|----------------------------|
|                                                  | <b>MG positive, n=67</b> |                    | <b>CT positive, n=79</b> |                    | <b>p-value<sup>c</sup></b> |
|                                                  |                          | <b>(%, 95% CI)</b> |                          | <b>(%, 95% CI)</b> |                            |
| <b>Vaginal discharge</b>                         |                          |                    |                          |                    |                            |
| No                                               | 15                       | (25, 14-37)        | 17                       | (32, 18-48)        | 0.826                      |
| Yes                                              | 46                       | (75, 63-86)        | 57                       | (68, 52-82)        |                            |
| Not assessed/missing                             | 6                        |                    | 5                        |                    |                            |
| <b>Abnormal odor<sup>c</sup></b>                 |                          |                    |                          |                    |                            |
| No                                               | 44                       | (72, 59-83)        | 50                       | (68, 56-78)        | 0.566                      |
| Yes                                              | 17                       | (28, 14-41)        | 24                       | (32, 22-44)        |                            |
| Not assessed/missing                             | 6                        |                    | 5                        |                    |                            |
| <b>Vulval redness</b>                            |                          |                    |                          |                    |                            |
| No                                               | 46                       | (75, 63-86)        | 61                       | (82, 72-90)        | 0.317                      |
| Yes                                              | 15                       | (25, 14-37)        | 13                       | (18, 10-28)        |                            |
| Not assessed/missing                             | 6                        |                    | 5                        |                    |                            |
| <b>Mucopurulent cervicitis</b>                   |                          |                    |                          |                    |                            |
| No                                               | 37                       | (82, 68-92)        | 46                       | (73, 60-83)        | 0.263                      |
| Yes                                              | 8                        | (18, 8-32)         | 17                       | (27, 17-40)        |                            |
| Not assessed/missing                             | 22                       |                    | 16                       |                    |                            |
| <b>Cervical or adnexal motion tenderness</b>     |                          |                    |                          |                    |                            |
| No                                               | 31                       | (86, 71-95)        | 37                       | (76, 61-87)        | 0.227                      |
| Yes                                              | 5                        | (14, 5-29)         | 12                       | (24, 13-39)        |                            |
| Not assessed/missing                             | 31                       |                    | 30                       |                    |                            |
| <b>Cervical contact bleeding</b>                 |                          |                    |                          |                    |                            |
| No                                               | 36                       | (84, 69-93)        | 44                       | (75, 62-85)        | 0.267                      |
| Yes                                              | 7                        | (16, 7-31)         | 15                       | (25, 15-38)        |                            |
| Not assessed/missing                             | 24                       |                    | 20                       |                    |                            |
| <b>Vaginal pH</b>                                |                          |                    |                          |                    |                            |
| ≤4.5                                             | 37                       | (56, 43-68)        | 38                       | (51, 39-63)        | 0.577                      |
| >4.5                                             | 29                       | (44, 32-57)        | 36                       | (49, 37-61)        |                            |
| Not assessed/missing                             |                          |                    |                          |                    |                            |
| <b>High vaginal polymorph count</b>              |                          |                    |                          |                    |                            |
| <5                                               | 35                       | (54, 41-66)        | 31                       | (41, 30-53)        | 0.121                      |
| ≥5                                               | 30                       | (46, 34-59)        | 45                       | (59, 47-70)        |                            |
| Not assessed/missing                             | 2                        |                    | 3                        |                    |                            |

**Notes:** Abbreviations: MG=*Mycoplasma genitalium*, n=number, CI=confidence interval, CT= *Chlamydia trachomatis*

<sup>a</sup> Analysis only includes women with CT or MG infection. Women co-infected with CT and MG have been excluded.

<sup>b</sup> Asymptomatic women were not clinically assessed and have been excluded from the analysis. Clinical signs were elicited only in women with clinical indications for examination and in particular, cervical assessment and bimanual examination was undertaken in women with specific indications for a speculum and bimanual exam..

<sup>c</sup> p-value calculated using Chi-square test

<sup>c</sup> Abnormal odour refers to any odour, not specifically a fishy odour.

Indications for testing women for *M. genitalium*.

| <b>Supplementary Table 4. Associations between <i>Chlamydia trachomatis</i> and clinical signs among symptomatic women<sup>ab</sup></b> |                           |                                       |                                      |                                                 |                            |
|-----------------------------------------------------------------------------------------------------------------------------------------|---------------------------|---------------------------------------|--------------------------------------|-------------------------------------------------|----------------------------|
|                                                                                                                                         | <b>Total women n=1037</b> | <b>CT negative n=958 (% , 95% CI)</b> | <b>CT positive n=79 (% , 95% CI)</b> | <b>Adjusted odds ratio (95% CI)<sup>c</sup></b> | <b>p-value<sup>d</sup></b> |
| <b>Vaginal discharge</b>                                                                                                                |                           |                                       |                                      |                                                 |                            |
| No                                                                                                                                      | 325                       | 308 (35, 32-39)                       | 17 (23, 14-34)                       | 1                                               |                            |
| Yes                                                                                                                                     | 623                       | 566 (65, 61-68)                       | 57 (77, 66-86)                       | 2.13 (1.19-3.82)                                | <b>0.011</b>               |
| Not assessed/missing                                                                                                                    | 89                        | 84                                    | 5                                    |                                                 |                            |
| <b>Abnormal odour<sup>e</sup></b>                                                                                                       |                           |                                       |                                      |                                                 |                            |
| No                                                                                                                                      | 717                       | 667 (76, 73-79)                       | 50 (68, 56-78)                       | 1                                               |                            |
| Yes                                                                                                                                     | 233                       | 209 (24, 21-27)                       | 24 (32, 22-44)                       | 1.42 (0.84-2.41)                                | 0.193                      |
| Not assessed/missing                                                                                                                    | 87                        | 82                                    | 5                                    |                                                 |                            |
| <b>Vulval redness</b>                                                                                                                   |                           |                                       |                                      |                                                 |                            |
| No                                                                                                                                      | 690                       | 629 (72, 69-75)                       | 61 (82, 72-90)                       | 1                                               |                            |
| Yes                                                                                                                                     | 252                       | 239 (28, 25-31)                       | 13 (18, 10-28)                       | 0.82 (0.40-1.67)                                | 0.589                      |
| Not assessed/missing                                                                                                                    | 95                        | 90                                    | 5                                    |                                                 |                            |
| <b>Mucopurulent cervicitis</b>                                                                                                          |                           |                                       |                                      |                                                 |                            |
| No                                                                                                                                      | 657                       | 611 (89, 86-91)                       | 46 (73, 60-83)                       | 1                                               |                            |
| Yes                                                                                                                                     | 93                        | 76 (11, 9-14)                         | 17 (27, 17-40)                       | 2.85 (1.49-5.44)                                | <b>0.002</b>               |
| Not assessed/missing                                                                                                                    | 287                       | 271                                   | 16                                   |                                                 |                            |
| <b>Cervical or adnexal motion tenderness</b>                                                                                            |                           |                                       |                                      |                                                 |                            |
| No                                                                                                                                      | 482                       | 445 (78, 75-82)                       | 37 (76, 61-87)                       | 1                                               |                            |
| Yes                                                                                                                                     | 135                       | 123 (22, 18-25)                       | 12 (24, 13-39)                       | 0.99 (0.48-2.07)                                | 0.986                      |
| Not assessed/missing                                                                                                                    | 420                       | 390                                   | 30                                   |                                                 |                            |
| <b>Cervical contact bleeding</b>                                                                                                        |                           |                                       |                                      |                                                 |                            |
| No                                                                                                                                      | 600                       | 556 (86, 83-88)                       | 44 (75, 62-85)                       | 1                                               |                            |
| Yes                                                                                                                                     | 107                       | 92 (14, 12-17)                        | 15 (25, 15-38)                       | 1.93 (0.98-3.78)                                | 0.056                      |
| Not assessed/missing                                                                                                                    | 330                       | 310                                   | 20                                   |                                                 |                            |
| <b>Vaginal pH</b>                                                                                                                       |                           |                                       |                                      |                                                 |                            |
| ≤4.5                                                                                                                                    | 602                       | 564 (62, 59-65)                       | 38 (51, 39-63)                       | 1                                               |                            |
| >4.5                                                                                                                                    | 384                       | 348 (38, 25-41)                       | 36 (49, 37-61)                       | 1.42 (0.87-2.33)                                | 0.161                      |
| Not assessed/missing                                                                                                                    |                           |                                       |                                      |                                                 |                            |
| <b>High vaginal polymorph count</b>                                                                                                     |                           |                                       |                                      |                                                 |                            |
| <5                                                                                                                                      | 587                       | 556 (60, 57-63)                       | 31 (41, 30-53)                       | 1                                               |                            |
| ≥5                                                                                                                                      | 414                       | 369 (40, 37-43)                       | 45 (59, 47-70)                       | 2.50 (1.49-4.20)                                | <b>0.001</b>               |
| Not assessed/missing                                                                                                                    | 36                        | 33                                    | 3                                    |                                                 |                            |

Abbreviations: MG=*Mycoplasma genitalium*, n=number, CI=confidence interval

<sup>a</sup>Women with an unassessable CT result (n=10) or with *M. genitalium* (n= 83; including 8 women coinfecting with CT and *M. genitalium* en) were excluded from the analysis. In addition, asymptomatic women (n=188) were not clinically assessed and have been excluded from the analysis.

<sup>b</sup>Clinical signs were elicited only in women with clinical indications for examination and in particular, cervical assessment and bimanual examination was undertaken in women with specific indications for a speculum and bimanual exam.

<sup>c</sup>All analyses were adjusted number of male sexual partners, vulvovaginal candidiasis, *N. gonorrhoea* and concurrent BV, with the exception that we did not adjust for BV in models examining associations with individual Amsel criteria (i.e. vaginal discharge, abnormal vaginal odour and vaginal pH)

<sup>d</sup>p-value calculated using logistic regression and bold indicates significant findings p<0.05.

### Indications for testing women for *M.genitalium*.

<sup>e</sup>Abnormal vaginal odor refers to any clinician-recorded odour, not specifically a fishy odour
